# Supplementary material
Source: publisher site journal article supplement (https://www.dovepress.com/article/301734)
Supplement: Supplementary file 1 [file get_supplementary_file.php]

**Supporting Information**

**A Highly Efficient One-for-all Nanodroplet for Ultrasound Imaging-guided and Cavitation Enhanced Photothermal Therapy**

***In vitro* US Imaging and** **Acoustic Cavitation of Photothermal Microbubbles**


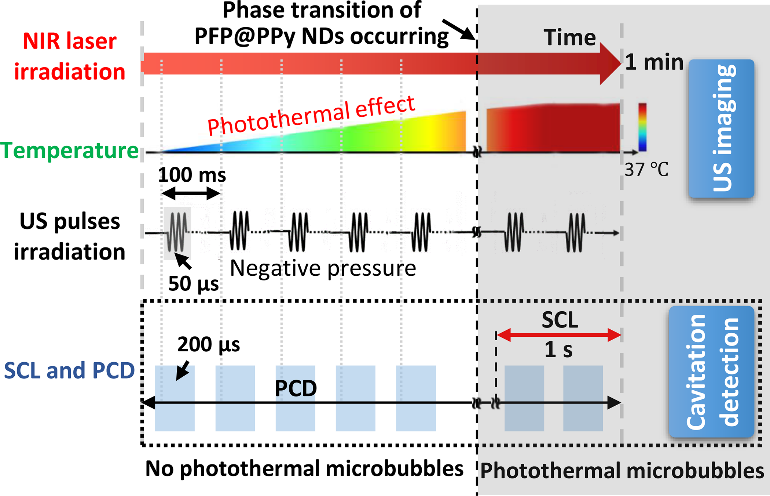


**Figure S1.** Experimental scheme for*in vitro* US imaging and acoustic cavitation of photothermal microbubbles.

When concurrent laser and US was used, the generated photothermal microbubbles can also act as cavitation nuclei to increase the acoustic cavitation activity. As shown in Figure S2, a high power pulser (RPR-4000, Ritec Inc., USA) was used to drive a 1-MHz unfocused flat piezoceramic transducer (diameter = 30 mm, Wuxi Lanhui Electronic, China) for US application. The transducer was positioned at a corresponding distance 106 mm away from the sample. The acoustic cavitation of photothermal microbubbles was characterized by sonochemiluminescence (SCL) and passive cavitation detection (PCD) methods. First, the SCL experiment was conducted in a lightproof box using an EMCCD camera (iXon3897, Andor Technology Plc., UK). The total acquisition time for SCL was 1 s. The images were post-processed by subtracting the reference image (no nandodroplets) using Andor Solis software (Andor technology Plc., UK). The luminous region can reveal the spatial distribution of the cavitation events. For the PCD experiments, the emitted acoustic signals were measured using a needle hydrophone (1.0 mm diameter, Precision Acoustics Ltd., UK), amplified by a pre-amplifier and digitized at a 100 MHz sample rate (PCI5122, National Instruments, USA). Then, the frequency spectrum of the acoustic signals was obtained by Fast Fourier Transform. Specifically, a custom MATLAB script was developed with a similar method as described previously1. First, a window from 120–220 μs referenced to the beginning of the acoustic pulse was applied to select the signal emitted during the acoustic cavitation of photothermal microbubbles. Then the RF signal was converted into the frequency domain by Fast Fourier Transform. Notably, three transistor-transistor logic (TTL) signals with appropriate time delays from an arbitrary waveform generator (AWG 2021, Sony Tektronix, Japan) were used to trigger the high power pulser, EMCCD camera and high-speed digitizer, respectively.


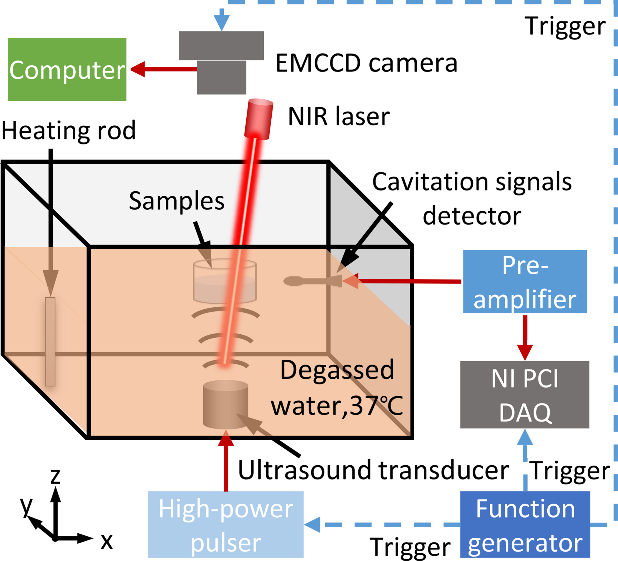


**Figure S2.** Schematic diagram of the experimental setup for the characterization of the acoustic cavitation of generated photothermal microbubbles using sonochemiluminescence (SCL) and passive cavitation detection (PCD) methods.

**Characterization of PFP Nanodroplets and PFP@PPy Nanodroplets**


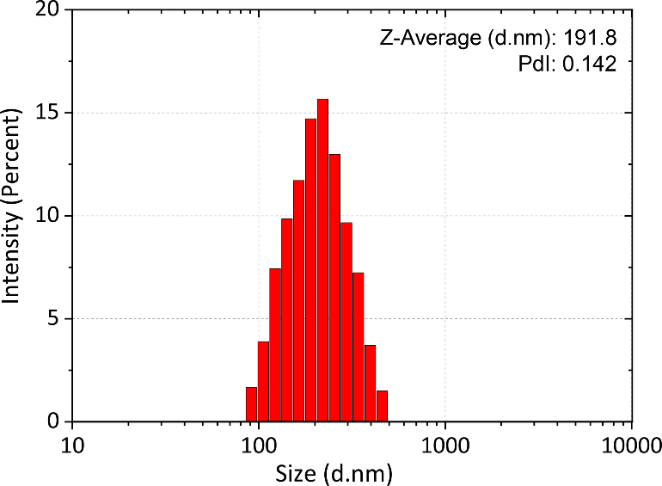


**Figure S3.** The size distribution of PFP nanodroplets as measured by the dynamic light scattering.





**Figure S4.** The average diameter variation over time (24 h) at physiological temperature (37 °C), determined by the dynamic light scattering.

**Calculation of the Photothermal Conversion Efficiency of PFP@PPy Nanodroplets**

1.5 mL PFP@PPy nanodroplets (0.1% v/v) were loaded in a 1.5 mL centrifuge tube and fixed. They were irradiated with an 808nm laser at an output power density of 1.0 W/cm2 for 10 min. The temperatures were recorded every 20s for 20 min (including natural cooling process for 10 min) with a thermocouple. The temperature profile is shown in Figure S7 (a). The photothermal conversion efficiency η was calculated according to reference.2


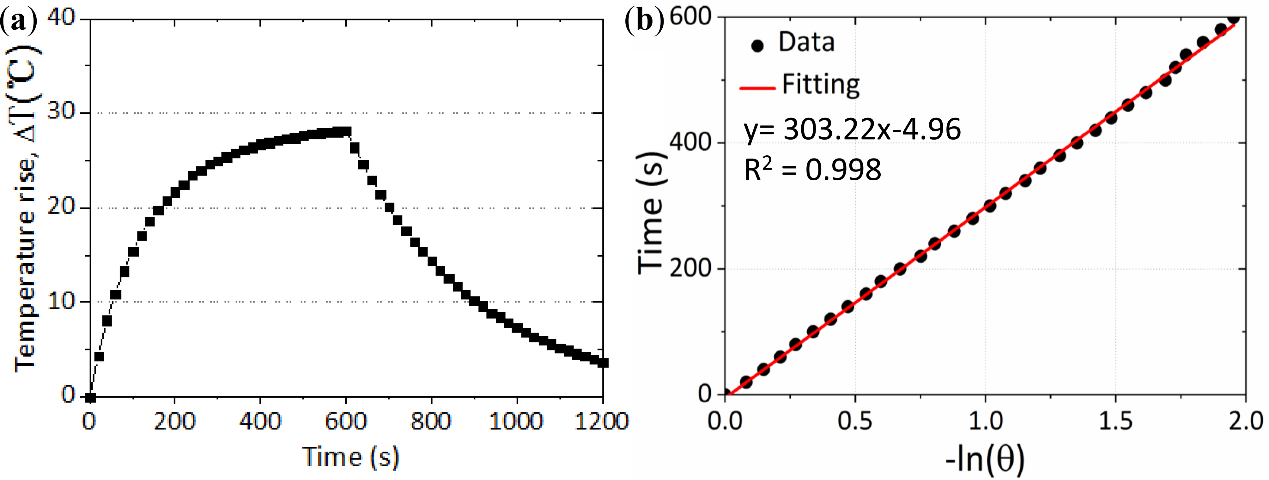


**Figure S5.** (**a**) Photothermal effect of PFP@PPy nanodroplets was recorded with the irradiation lasted for 10min and then naturally cooled down. (**b**) Linear time data versus –ln (θ) obtained from the cooling period of (A).

where *Tmax* - *Tsurr* was 28.2°C, *Qdis* was measured independently to be 60.3 mW, *I* was 1.0 W/cm2 and A808 was 0.9. According to Figure S5 (b), *τs* was determined to be 303.22s, *hs* could be calculated form

where is 1.5g and is 4.2J/g·°C. The final photothermal conversion efficiency was calculated to be 60.13%.

In vitro US Imaging Performance of Photothermal Microbubbles


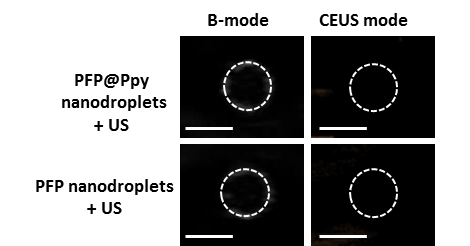


**Figure S6.** B-mode and contrast enhanced ultrasound (CEUS) imaging of PFP@PPy nanodroplets after US irradiation alone (1 MHz, 2.2 MPa, 50 μs and 10 Hz) for 1 min in gel phantoms. The same concentration of PFP nanodroplets were used as negative controls. Scale bar = 1 cm.

***In vivo* Evaluation of the Enhanced US Imaging and** **Antitumor Effect**


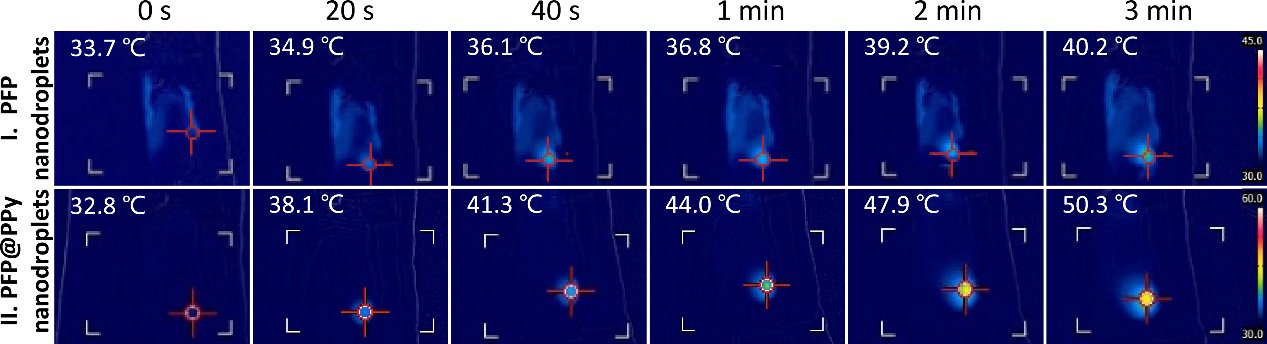


**Figure S7.** The photothermal temperature elevation of the tumor sites in the two groups: (I) PFP nanodroplets and (II) PFP@PPy nanodroplets. Temperature was monitored by the *in vivo* infrared thermal images every 20 s.


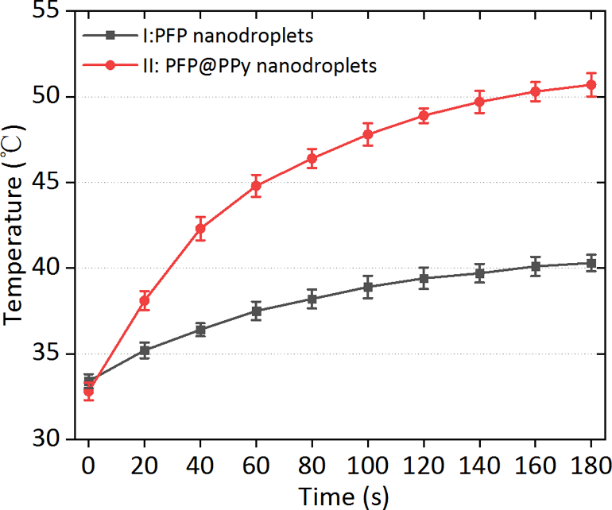


**Figure S8.** The temperature-time curves of the tumor sites in the two groups: (I) PFP nanodroplets and (II) PFP@PPy nanodroplets (n = 3 in each group).


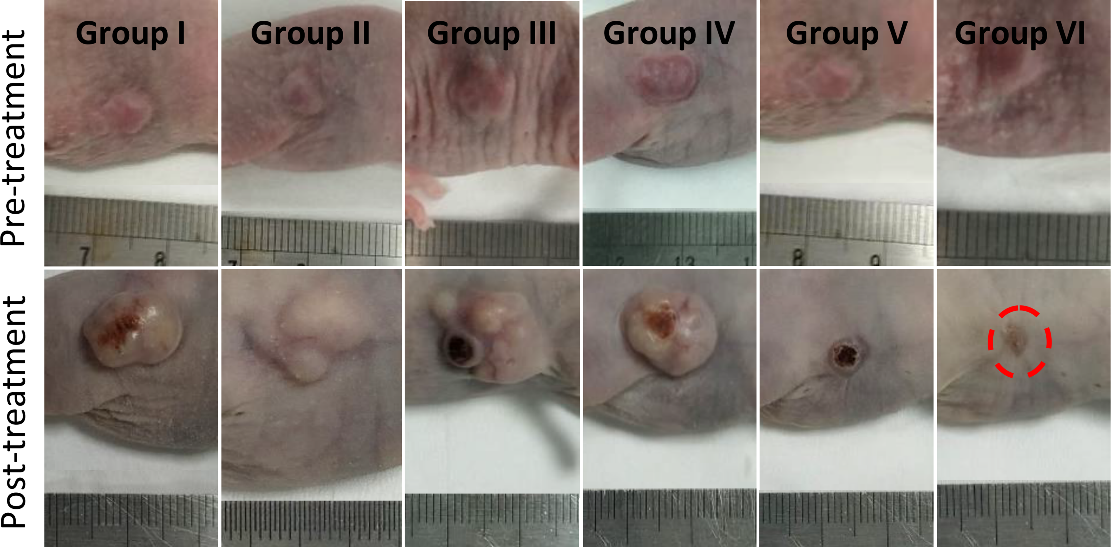


**Figure S9.** Photographs of HeLa-bearing nude mice before and after various treatments (Groups I: Saline, II: PFP@PPy nanodroplets, III: laser + US, IV: PFP@PPy nanodroplets + US, V: PFP@PPy nanodroplets + laser, VI: PFP@PPy nanodroplets + laser + US).

**References**

1. Feng Y, Qin D, Zhang J, Zhang L, Bouakaz A, Wan M, Occlusion and rupture of ex vivo capillary bifurcation due to acoustic droplet vaporization, *Appl Phys Let*t. 2018;112: 233701.
2. Roper DK, Ahn W, Hoepfner M, Microscale heat transfer transduced by surface plasmon resonant gold nanoparticles, *J Phys Chem C*. 2007; 111: 3636-41.
